# Supplementary material for: Population Pharmacokinetics of Cefazolin in Serum and Tissue for Patients with Complicated Skin and Soft Tissue Infections (cSSTI)
Source: Springer Nature journal article supplement (doi:10.1007/s40121-014-0049-3), 2014-11-20
Supplement: MOESM1 [file 9339664]

- Cefazolin penetration into the interstitial fluid of a lower limb infection varied across this simulated patient population.
- Cefazolin 1 g every eight hours (q8h) % $fT > MIC$  (the percent of the dosing interval that free drug concentrations remained above the minimum inhibitory concentration) exposures in serum were high at MICs of 1 mg/L and 2 mg/L.
- Based on the tissue exposure, 1 g q8h dose regimen should be sufficient to achieve 30%  $fT > MIC$  target against most methicillin-susceptible *Staphylococcus aureus* causing complicated skin and soft tissue infections (cSSTI).
- For Enterobacteriaceae with MIC of 2 mg/L, the probability of target attainment (PTA) for the established 50%  $fT > MIC$  target, were not optimal with 1 g q8h dose.
- At least 2 g q8h is required to achieve PTA of  $\geq 80\%$  when treating cSSTI caused by susceptible Enterobacteriaceae (MIC  $\leq 2$  mg/L).

This summary slide represents the opinions of the authors. This work was supported internally by the Center for Anti-Infective Research and Development, Hartford Hospital, Hartford, CT, USA. For a full list of acknowledgments and conflicts of interest for all authors of this article, please see the full text online. Copyright © The Author(s) 2014. Creative Commons Attribution Noncommercial License (CC BY-NC).
